# Supplementary material
Source: PubMed Central journal article supplement (PMC10794004)
Supplement: NIHMS1733686-supplement-Supplemental_Material.pdf [file NIHMS1733686-supplement-Supplemental_Material.pdf]

## Electronic Supplementary File 1

*Sample characteristics (N=515)*

|                                                   | n   | Mean  | Standard Deviation | Observed Range |
|---------------------------------------------------|-----|-------|--------------------|----------------|
| Age (in years)                                    | 515 | 61.41 | 5.41               | 55-80          |
| Number of Pack Years Smoked                       | 515 | 56.61 | 26.84              | 30-248         |
| Number of Years since Last Cigarette Smoked       | 515 | 1.88  | 3.91               | 0-30           |
| CLSS Perceived Smoking-Related Lung Cancer Stigma | 515 | 13.80 | 2.66               | 5-20           |
|                                                   | n   | %     |                    |                |
| Smoking Status                                    |     |       |                    |                |
| Formerly Smoked                                   | 191 | 37.1  |                    |                |
| Currently Smoked                                  | 324 | 62.9  |                    |                |
| Gender                                            |     |       |                    |                |
| Male                                              | 179 | 34.8  |                    |                |
| Female                                            | 334 | 64.9  |                    |                |
| Other                                             | 2   | 0.3   |                    |                |
| Ethnicity                                         |     |       |                    |                |
| Hispanic/Latino                                   | 29  | 5.6   |                    |                |
| Not Hispanic/Latino                               | 486 | 94.4  |                    |                |
| Race                                              |     |       |                    |                |
| White or Caucasian                                | 435 | 84.5  |                    |                |
| Black/African-American                            | 53  | 10.3  |                    |                |
| Asian/Pacific Islander                            | 2   | 0.4   |                    |                |
| American Indian or Alaskan Native                 | 4   | 0.8   |                    |                |
| More than one race                                | 13  | 2.5   |                    |                |
| Other race                                        | 8   | 1.8   |                    |                |
| Marital Status                                    |     |       |                    |                |
| Married or living as married                      | 231 | 54.6  |                    |                |
| Not Married                                       | 281 | 44.9  |                    |                |
| Did not report                                    | 3   | 0.6   |                    |                |
| Education                                         |     |       |                    |                |
| Less than High School                             | 39  | 7.6   |                    |                |
| High School Graduate                              | 157 | 30.5  |                    |                |
| Some College                                      | 184 | 35.7  |                    |                |
| College Graduate or Higher                        | 135 | 26.2  |                    |                |
| Annual Household Income                           |     |       |                    |                |
| Less than \$25,000                                | 223 | 43.3  |                    |                |
| \$25,000–\$50,000                                 | 175 | 34.0  |                    |                |
| More than \$50,000                                | 117 | 22.7  |                    |                |
| Employment Status                                 |     |       |                    |                |
| Not working for pay                               | 299 | 58.1  |                    |                |
| Working part-time                                 | 83  | 16.1  |                    |                |
| Working full-time                                 | 132 | 25.6  |                    |                |
| Did not report                                    | 1   | 0.2   |                    |                |

*Note:* CLSS = Cataldo Lung Cancer Stigma Scale.
